# Supplementary material
Source: PubMed Central journal article supplement (PMC11104889)
Supplement: 18_2019_3413_MOESM1_ESM.pdf [file 18_2019_3413_MOESM1_ESM.pdf]

## **Supplementary Information**

**Communication between human macrophages and epithelial cancer cell lines dictates lipid mediator biosynthesis**

**Cellular and Molecular Life Sciences**

Markus Werner, Simona Pace, Anna Czapka, Paul Jordan, Jana Gerstmeier, Andreas Koeberle, Oliver Werz

**Correspondence:** Prof. Dr. Oliver Werz, Department of Pharmaceutical/Medicinal Chemistry, Institute of Pharmacy, Friedrich-Schiller-University Jena, Philosophenweg 14, 07743 Jena, Germany; E-mail: [oliver.werz@uni-jena.de](mailto:oliver.werz@uni-jena.de)

**Content:** Online Resource 1-3

## Online Resource 1

|                         |                    | MDM<br>[pg]      | MDM <sub>A549</sub><br>[pg] |
|-------------------------|--------------------|------------------|-----------------------------|
| COX                     | PGE <sub>2</sub>   | 282 ± 61         | 514 ± 90                    |
|                         | PGD <sub>2</sub>   | 106 ± 18         | 133 ± 18                    |
|                         | PGF <sub>2α</sub>  | 418 ± 57         | 482 ± 27                    |
|                         | TXB <sub>2</sub>   | 7772 ± 1235      | 9467 ± 1198                 |
|                         | 11-HETE            | 1611 ± 332       | 2159 ± 377                  |
|                         | 11-HEPE            | 40 ± 16          | 45 ± 11                     |
| 5-LO/FLAP               | 5-HETE             | 1577 ± 265       | 3089 ± 561                  |
|                         | 5-HEPE             | 221 ± 33         | 337 ± 53                    |
|                         | LTB <sub>4</sub>   | 1241 ± 539       | 2229 ± 310                  |
|                         | t-LTB <sub>4</sub> | 511 ± 255        | 674 ± 125                   |
|                         | 5S,6R-diHETE       | 89 ± 37          | 148 ± 27                    |
| mono/di-hydroxylated FA | 14-HDHA            | 1030 ± 192       | 1450 ± 319                  |
|                         | 7-HDHA             | 207 ± 15         | 250 ± 38                    |
|                         | 4-HDHA             | 38 ± 3           | 23 ± 3                      |
|                         | 15-HETE            | 17,875 ± 4739    | 25,696 ± 4931               |
|                         | 12-HETE            | 1620 ± 378       | 2389 ± 388                  |
|                         | 5,15-diHETE        | 2139 ± 1256      | 2851 ± 655                  |
|                         | 15-HEPE            | 2804 ± 1146      | 3188 ± 809                  |
|                         | 12-HEPE            | 290 ± 107        | 319 ± 79                    |
|                         | 5,15-diHEPE        | 39 ± 13          | 47 ± 9                      |
| bioactive SPM           | 18-HEPE            | 51 ± 14          | 62 ± 12                     |
|                         | RvE3               | 235 ± 113        | 284 ± 57                    |
|                         | 17-HDHA            | 6241 ± 998       | 8420 ± 1506                 |
|                         | PDX                | 10 ± 3           | 11 ± 3                      |
|                         | MaR1               | 230 ± 72         | 263 ± 77                    |
|                         | RvD2               | 52 ± 26          | 60 ± 26                     |
|                         | RvD4               | 4 ± 3            | 5 ± 4                       |
|                         | RvD5               | 655 ± 256        | 761 ± 227                   |
| LXA <sub>4</sub>        | 37 ± 23            | 46 ± 8           |                             |
| fatty acids             | AA                 | 90,535 ± 11,746  | 124,218 ± 23,663            |
|                         | EPA                | 105,623 ± 21,498 | 104,369 ± 23,873            |
|                         | DHA                | 72,063 ± 9722    | 73,215 ± 12,888             |

### LM biosynthesis in MDM monocultures and in cocultures of MDM with A549 cells.

MDM ( $2 \times 10^6$  cells) in monocultures or in cocultures with  $2 \times 10^6$  A549 cells were treated with IL-4 for 48 hrs in a Boyden chamber. MDM were then separated from A549. MDM were challenged with *E. coli* (O6:K2:H1; ratio = 1:50) for 90 min. Released LMs were extracted from the medium and analyzed by UPLC-MS/MS. Data are given in pg per  $2 \times 10^6$  MDM; mean ± S.E.M;  $n = 7$ .

## Online Resource 2

| 0  100  ≥300% |                    | MDM<br>+ DMSO      |                    | MDM<br>+ Skep-L |                    | [%]                | MDM <sub>A549</sub><br>+ DMSO |  | MDM <sub>A549</sub><br>+ Skep-L |  | [%] |
|---------------------------------------------------------------------------------------------------------------------------------------------------------------------------------|--------------------|--------------------|--------------------|-----------------|--------------------|--------------------|-------------------------------|--|---------------------------------|--|-----|
| COX                                                                                                                                                                             | PGE <sub>2</sub>   | 289 ± 113          | 264 ± 104          | 91              | 689 ± 190          | 594 ± 87           | 86                            |  |                                 |  |     |
|                                                                                                                                                                                 | PGD <sub>2</sub>   | 114 ± 29           | 106 ± 27           | 92              | 180 ± 29           | 141 ± 6            | 79                            |  |                                 |  |     |
|                                                                                                                                                                                 | PGF <sub>2α</sub>  | 447 ± 109          | 369 ± 82           | 83              | 578 ± 147          | 427 ± 39           | 74                            |  |                                 |  |     |
|                                                                                                                                                                                 | TXB <sub>2</sub>   | 28,033 ± 10,447    | 26,412 ± 8864      | 94              | 34,297 ± 11,780    | 28,417 ± 3655      | 83                            |  |                                 |  |     |
|                                                                                                                                                                                 | 11-HETE            | 342 ± 50           | 311 ± 49           | 91              | 596 ± 101          | 510 ± 53           | 86                            |  |                                 |  |     |
| 5-LO/FLAP                                                                                                                                                                       | 5-HETE             | 2062 ± 770         | 999 ± 344          | 48              | 5187 ± 3505        | 2020 ± 1037        | 39                            |  |                                 |  |     |
|                                                                                                                                                                                 | 5-HEPE             | 247 ± 110          | 93 ± 25            | 38              | 387 ± 248          | 145 ± 55           | 37                            |  |                                 |  |     |
|                                                                                                                                                                                 | t-LTB <sub>4</sub> | 422 ± 162          | 209 ± 82           | 49              | 832 ± 253          | 272 ± 33           | 33                            |  |                                 |  |     |
|                                                                                                                                                                                 | LTB <sub>4</sub>   | 203 ± 72           | 93 ± 27            | 46              | 502 ± 121          | 156 ± 22           | 31                            |  |                                 |  |     |
|                                                                                                                                                                                 | 5S,6R-diHETE       | 109 ± 35           | 42 ± 10            | 38              | 293 ± 163          | 58 ± 17            | 20                            |  |                                 |  |     |
| mono/di-hydroxylated FA                                                                                                                                                         | 14-HDHA            | 649 ± 228          | 589 ± 226          | 91              | 813 ± 334          | 793 ± 422          | 98                            |  |                                 |  |     |
|                                                                                                                                                                                 | 7-HDHA             | 283 ± 56           | 247 ± 52           | 87              | 283 ± 89           | 242 ± 80           | 85                            |  |                                 |  |     |
|                                                                                                                                                                                 | 4-HDHA             | 38 ± 9             | 40 ± 12            | 106             | 60 ± 19            | 47 ± 15            | 78                            |  |                                 |  |     |
|                                                                                                                                                                                 | 15-HETE            | 8165 ± 2431        | 6858 ± 2402        | 84              | 13,011 ± 2720      | 11,252 ± 3878      | 86                            |  |                                 |  |     |
|                                                                                                                                                                                 | 12-HETE            | 873 ± 314          | 775 ± 308          | 89              | 1325 ± 347         | 1239 ± 630         | 93                            |  |                                 |  |     |
|                                                                                                                                                                                 | 5,15-diHETE        | 1151 ± 559         | 750 ± 305          | 65              | 1992 ± 622         | 1281 ± 653         | 64                            |  |                                 |  |     |
|                                                                                                                                                                                 | 15-HEPE            | 666 ± 130          | 488 ± 139          | 73              | 881 ± 188          | 692 ± 250          | 79                            |  |                                 |  |     |
|                                                                                                                                                                                 | 12-HEPE            | 161 ± 14           | 102 ± 25           | 63              | 184 ± 40           | 147 ± 63           | 80                            |  |                                 |  |     |
|                                                                                                                                                                                 | 5,15-diHEPE        | 62 ± 21            | 40 ± 14            | 64              | 70 ± 21            | 58 ± 31            | 83                            |  |                                 |  |     |
| bioactive SPM                                                                                                                                                                   | 18-HEPE            | 104 ± 58           | 22 ± 5             | 21              | 49 ± 10            | 46 ± 9             | 93                            |  |                                 |  |     |
|                                                                                                                                                                                 | RvE3               | 246 ± 107          | 148 ± 63           | 60              | 425 ± 99           | 260 ± 111          | 61                            |  |                                 |  |     |
|                                                                                                                                                                                 | 17-HDHA            | 2858 ± 981         | 2571 ± 929         | 90              | 3843 ± 1572        | 3685 ± 1470        | 96                            |  |                                 |  |     |
|                                                                                                                                                                                 | PDX                | 6 ± 2              | 6 ± 2              | 105             | 9 ± 3              | 9 ± 6              | 103                           |  |                                 |  |     |
|                                                                                                                                                                                 | MaR1               | 23 ± 13            | 21 ± 12            | 90              | 25 ± 13            | 27 ± 18            | 110                           |  |                                 |  |     |
|                                                                                                                                                                                 | RvD2               | 19 ± 11            | 19 ± 10            | 97              | 22 ± 12            | 23 ± 15            | 104                           |  |                                 |  |     |
|                                                                                                                                                                                 | RvD4               | 7 ± 4              | 5 ± 3              | 81              | 6 ± 3              | 3 ± 3              | 55                            |  |                                 |  |     |
|                                                                                                                                                                                 | RvD5               | 644 ± 292          | 544 ± 247          | 84              | 915 ± 477          | 869 ± 616          | 95                            |  |                                 |  |     |
| LXA <sub>4</sub>                                                                                                                                                                | 20 ± 11            | 11 ± 7             | 56                 | 32 ± 12         | 14 ± 8             | 43                 |                               |  |                                 |  |     |
| fatty acids                                                                                                                                                                     | AA                 | 1141,187 ± 428,470 | 1289,412 ± 547,782 | 113             | 1426,951 ± 506,043 | 1928,987 ± 715,110 | 135                           |  |                                 |  |     |
|                                                                                                                                                                                 | EPA                | 281,816 ± 161,304  | 204,199 ± 117,480  | 72              | 312,345 ± 196,321  | 307,073 ± 144,899  | 98                            |  |                                 |  |     |
|                                                                                                                                                                                 | DHA                | 161,749 ± 60,881   | 194,502 ± 72,730   | 120             | 207,852 ± 64,590   | 260,285 ± 84,685   | 125                           |  |                                 |  |     |

**Effect of Skepinone-L on LM formation in MDM and MDM<sub>A549</sub>.** MDM ( $2 \times 10^6$  cells) in monocultures or in cocultures with  $2 \times 10^6$  A549 cells were treated with IL-4 for 48 hrs in a Boyden chamber. MDM were then separated from A549. The MDM were preincubated for 15 min with 0.3  $\mu$ M Skepinone-L or vehicle (0.1% DMSO) and then challenged with *E. coli* (O6:K2:H1; ratio = 1:50) for another 90 min. Released LMs were extracted from the medium and analyzed by UPLC-MS/MS. Data are given in pg per  $2 \times 10^6$  MDM; mean  $\pm$  S.E.M; n = 3.

### Online Resource 3

|     |                   | A549       | A549 <sub>MDM</sub> | HT-29   | HT-29 <sub>MDM</sub> | HUVEC       | HUVEC <sub>MDM</sub> |
|-----|-------------------|------------|---------------------|---------|----------------------|-------------|----------------------|
| COX | PGE <sub>2</sub>  | 1206 ± 137 | 6928 ± 1822         | 25 ± 9  | 38 ± 6               | 447 ± 179   | 349 ± 58             |
|     | PGD <sub>2</sub>  | 77 ± 10    | 273 ± 53            | -       | -                    | 61 ± 27     | 49 ± 7               |
|     | PGF <sub>2α</sub> | 910 ± 35   | 2339 ± 456          | 26 ± 14 | 31 ± 16              | 9229 ± 3157 | 8873 ± 1437          |
|     | TXB <sub>2</sub>  | 2911 ± 113 | 6894 ± 1299         | 88 ± 29 | 88 ± 14              | 434 ± 197   | 423 ± 87             |

**Formation of COX products in *E. coli*-stimulated cancer cells (A549, HT-29) or HUVEC after monoculture or coculture with MDM.** Cancer cells or HUVEC ( $2 \times 10^6$  cells) were co-cultured for 48 hrs with  $2 \times 10^6$  MDM in the presence of 20 ng/ml IL-4 in a Boyden chamber (see Fig. 1a). Afterwards, cancer cells or HUVEC were separated from MDM and challenged with *E. coli* (O6:K2:H1; ratio = 1:50) for 90 min to induce LM production. LM were isolated by SPE and analysed by UPLC-MS/MS. Data are given in pg per  $2 \times 10^6$  cancer cells or HUVEC mean ± SEM; n = 3-4.
